# Supplementary material
Source: PubMed Central journal article supplement (PMC5884688)
Supplement: NIHMS745443-supplement-supplement_1.pdf [file NIHMS745443-supplement-supplement_1.pdf]

## Phospholamban as a Crucial Determinant of the Inotropic Response of Human Pluripotent Stem Cell–Derived Ventricular Cardiomyocytes and Engineered 3-Dimensional Tissue Constructs

Gaopeng Chen, Sen Li, Ioannis Karakikes, Lihuan Ren, Maggie Zi-Ying Chow, Anant Chopra, Wendy Keung, Bin Yan, Camie W.Y. Chan, Kevin D. Costa, Chi-Wing Kong, Roger J. Hajjar, Christopher S. Chen and Ronald A. Li

*Circ Arrhythm Electrophysiol.* 2015;8:193-202; originally published online December 10, 2014;  
doi: 10.1161/CIRCEP.114.002049

*Circulation: Arrhythmia and Electrophysiology* is published by the American Heart Association, 7272 Greenville Avenue, Dallas, TX 75231

Copyright © 2014 American Heart Association, Inc. All rights reserved.  
Print ISSN: 1941-3149. Online ISSN: 1941-3084

The online version of this article, along with updated information and services, is located on the World Wide Web at:

<http://circep.ahajournals.org/content/8/1/193>

Data Supplement (unedited) at:

<http://circep.ahajournals.org/content/suppl/2014/12/10/CIRCEP.114.002049.DC1>

**Permissions:** Requests for permissions to reproduce figures, tables, or portions of articles originally published in *Circulation: Arrhythmia and Electrophysiology* can be obtained via RightsLink, a service of the Copyright Clearance Center, not the Editorial Office. Once the online version of the published article for which permission is being requested is located, click Request Permissions in the middle column of the Web page under Services. Further information about this process is available in the [Permissions and Rights Question and Answer](#) document.

**Reprints:** Information about reprints can be found online at:  
<http://www.lww.com/reprints>

**Subscriptions:** Information about subscribing to *Circulation: Arrhythmia and Electrophysiology* is online at:  
<http://circep.ahajournals.org/subscriptions/>

## **SUPPLEMENTAL MATERIAL**

### **Supplemental Results**

We investigated the pharmacological responses of the various groups of hES2-vCMs to thapsigargin and ryanodine, specific SERCA and RyR inhibitors, respectively. Application of 1 $\mu$ mol/L thapsigargin to control hES2-vCMs (un- and Ad-GFP-transduced) significantly decreased the transient amplitude and slowed the decay ( $P<0.05$ ; Supplemental Figure 1). Likewise, ryanodine application (10 $\mu$ mol/L) significantly reduced the electrically evoked Ca<sup>2+</sup> transient amplitude and slowed the upstroke ( $P<0.01$ ; Supplemental Figure 1). Interestingly, while similar inhibitory effects on the peak amplitude, decay and upstroke by thapsigargin or ryanodine were seen with Ad-PLB-transduced hES2-vCMs, the changes were significantly less compared to the controls, indicating that Ad-PLB transduction rendered cells less sensitive to these pharmacological agents (Supplemental Figure 1). As anticipated from pseudo-phosphorylation, the effects of Ad-PLB-S16E on the responses to thapsigargin and ryanodine resembled those of controls (Supplemental Figure 1).

### **Supplemental Figure and Legends**

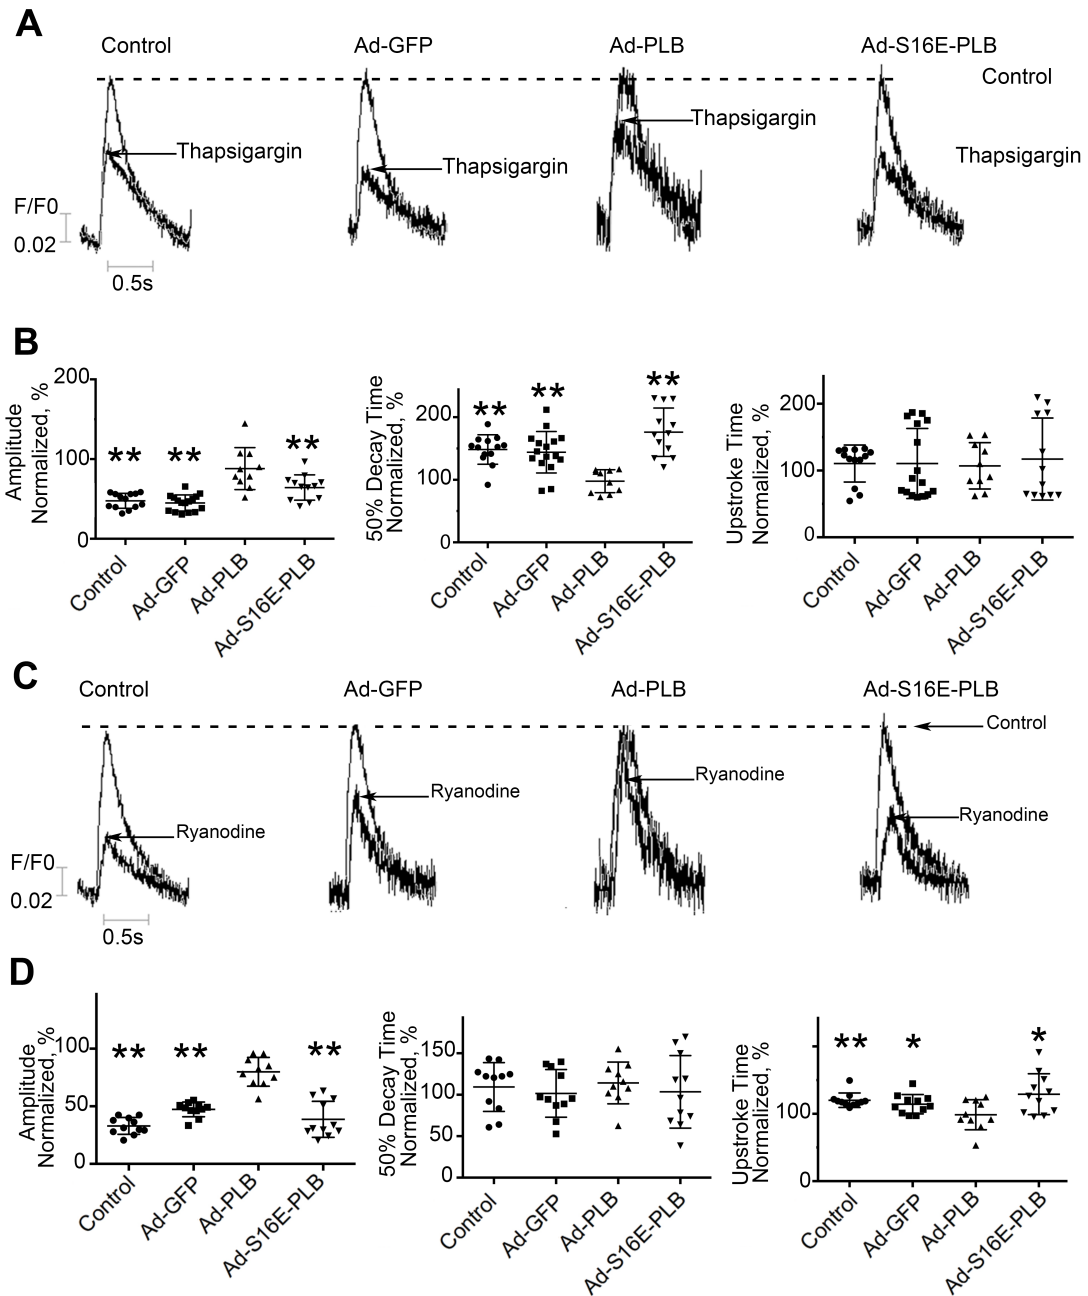

### Supplemental Figure 1

*Effects of thapsigargin or ryanodine on electrically-evoked Ca<sup>2+</sup> transient of un-, Ad-GFP-, Ad-PLB-, Ad-S16E-PLB-transduced hES2-vCMs.*

A) Representative raw tracings of electrically-induced Ca<sup>2+</sup> transients of un-, Ad-GFP-, Ad-PLB-, Ad-S16E-PLB-transduced hES2-vCMs recorded in the absence

and presence of 1 $\mu$ M thapsigargin as indicated. Peaks recorded under control drug-free condition of all groups have been normalized for comparison. **B)** Bar graphs summarizing the transient parameters of the same groups from A. At 1 $\mu$ mol/L, thapsigargin significantly decreased the amplitude of control, Ad-GFP and Ad-S16E-PLB- but not Ad-PLB-transduced hES2-vCMs. 50% decay time was affected in all groups except Ad-PLB-transduced hES2-vCMs. Upstroke time was not affected in any of the groups. (N=13, 16, 10 and 12 for control, Ad-GFP, Ad-PLB and Ad-S16E-PLB respectively.) **C)** Representative raw tracings of electrically-induced Ca<sup>2+</sup> transients of un-, Ad-GFP-, Ad-PLB-, Ad-S16E-PLB-transduced hES2-vCMs recorded in the absence and presence of 10 $\mu$ mol/L ryanodine as indicated. Peaks recorded under drug-free condition of all groups have been normalized. **D)** Bar graphs summarizing the transient parameters of the same groups from A. At 10 $\mu$ mol/L, ryanodine significantly decreased the amplitude of control, Ad-GFP and Ad-S16E-PLB- but not Ad-PLB-transduced hES2-vCMs. 50% decay time was unaffected in all groups. Upstroke time was affected in control, Ad-GFP and Ad-S16E-PLB- but not Ad-PLB-transduced hES2-vCMs (N=11, 11, 10 and 11 for control, Ad-GFP, Ad-PLB and Ad-S16E-PLB respectively). \*P<0.05, \*\*P<0.01, compared to parameters under drug-free condition.

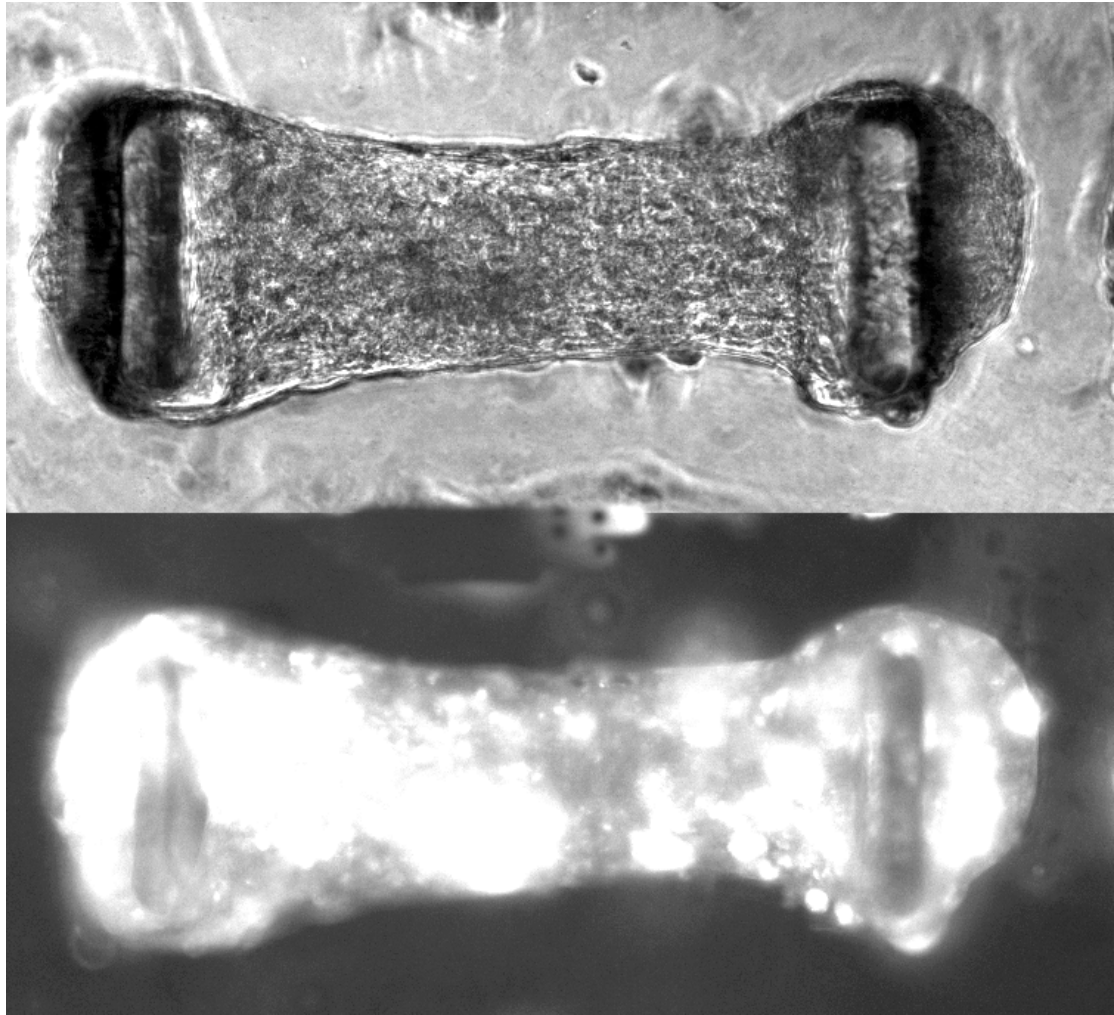

## Supplemental Figure 2

*Bright and fluorescence images of hvCMT after Ad-GFP transduction demonstrated that the hvCMT could be fully transduced by Ad.*

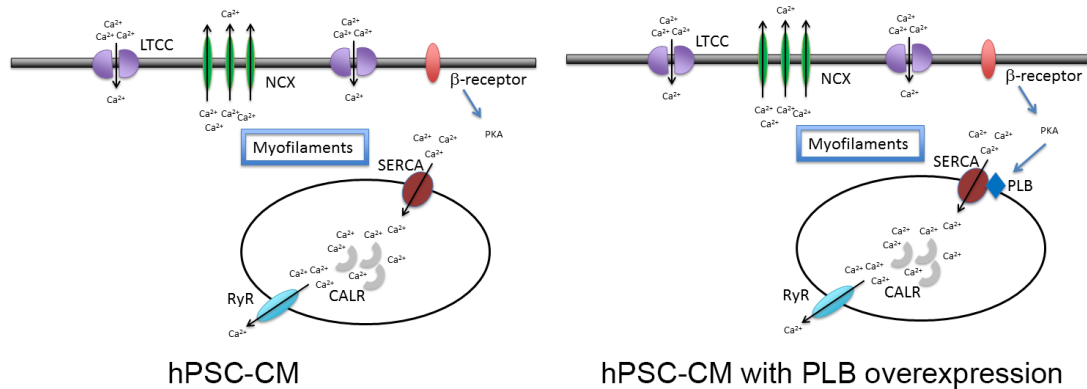

### **Supplemental Figure 3**

#### *Role of PLB in $Ca^{2+}$ handling of hPSC-CM.*

In adult CM, stimulation of  $\beta$ -adrenergic receptors leads to phosphorylation of PLB by PKA, which is a fundamental mechanism of the positive inotropic effect of  $\beta$ -adrenergic stimulation. However, PLB is missing in hPSC-CM. Overexpression of PLB in hPSC-CMs restored the positive inotropic response of hPSC-CM.
